# Supplementary material for: Atomic Layer Deposition of Pt Nanoparticles within the Cages of MIL-101: A Mild and Recyclable Hydrogenation Catalyst
Source: MDPI journal article supplement (doi:10.3390/nano6030045), 2016-03-09
Supplement: s1 [file s1]

# Supplementary Materials: Atomic Layer Deposition of Pt Nanoparticles within the Cages of MIL-101: A Mild and Recyclable Hydrogenation Catalyst

Karen Leus <sup>1,\*</sup>, Jolien Dendooven <sup>2</sup>, Norini Tahir <sup>1</sup>, Ranjith K Ramachandran <sup>2</sup>, Maria Meledina <sup>3</sup>, Stuart Turner <sup>3</sup>, Gustaaf Van Tendeloo <sup>3</sup>, Jan L. Goeman <sup>4</sup>, Johan Van der Eycken <sup>4</sup>, Christophe Detavernier <sup>2</sup> and Pascal Van Der Voort <sup>1,\*</sup>

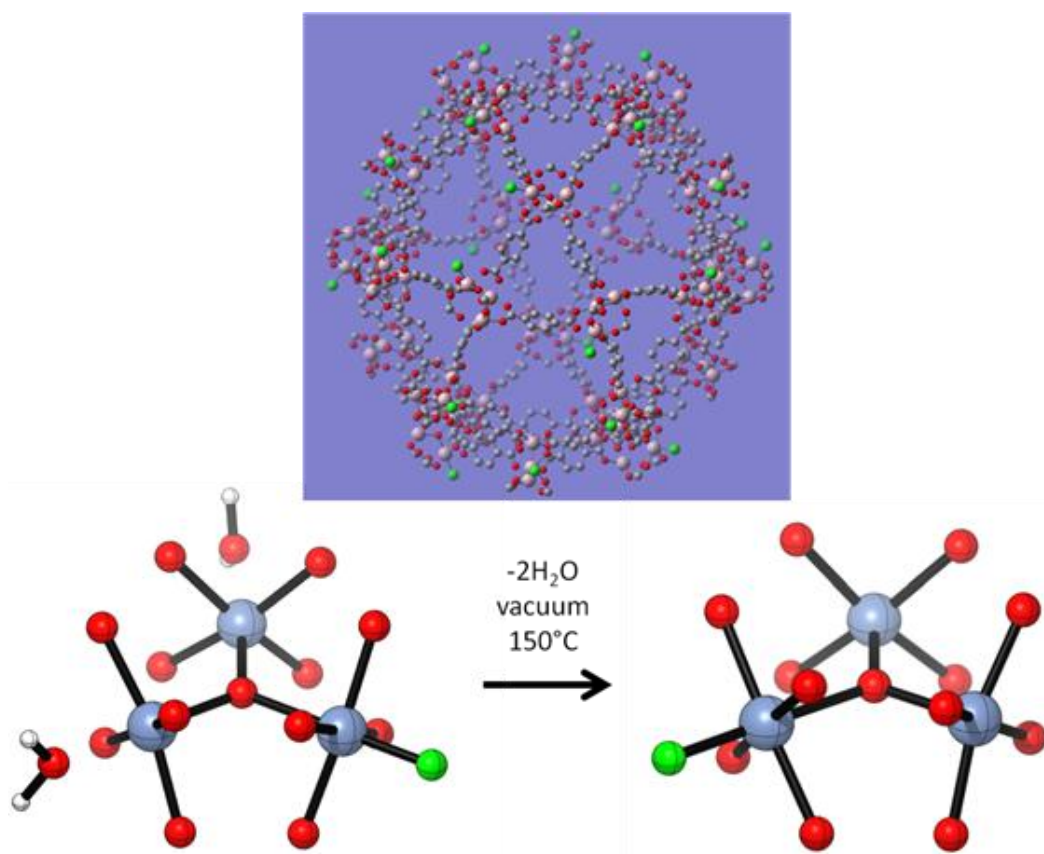

**Figure S1.** Schematic structure of a MIL-101 cage (**top**) and formation of coordinatively unsaturated sites after the removal of the terminal water molecules (**bottom**). (MIL = Materials Institute Lavoisier).

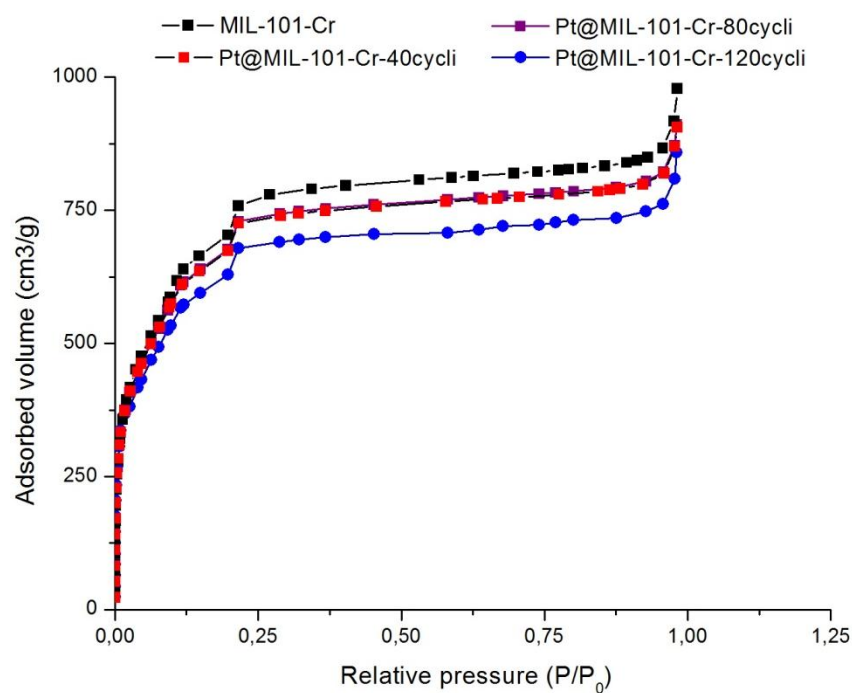

**Figure S2.** Nitrogen adsorption isotherms for MIL-101-Cr and the Pt@MIL-101-Cr obtained after respectively 40, 80 and 120 atomic layer deposition (ALD) cycles.

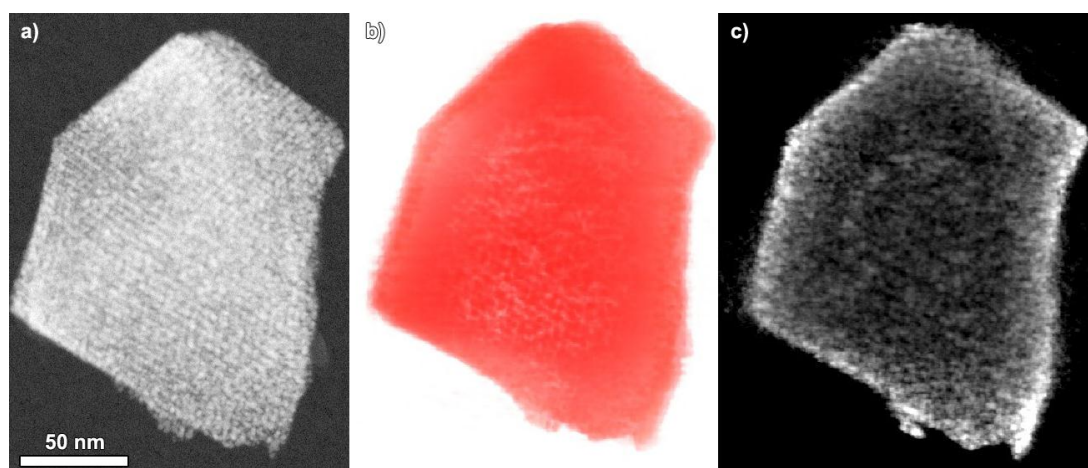

**Figure S3.** (a) (high angle) annular dark field scanning transmission electron microscopy measurements ((HA)ADF-STEM) image of a MIL-101 particle heavily loaded with Pt nanoparticles; (b) tomographic volume reconstruction of the same Pt@MIL-101 crystal and (c) orthoslice through the reconstruction.

See also uploaded movie.

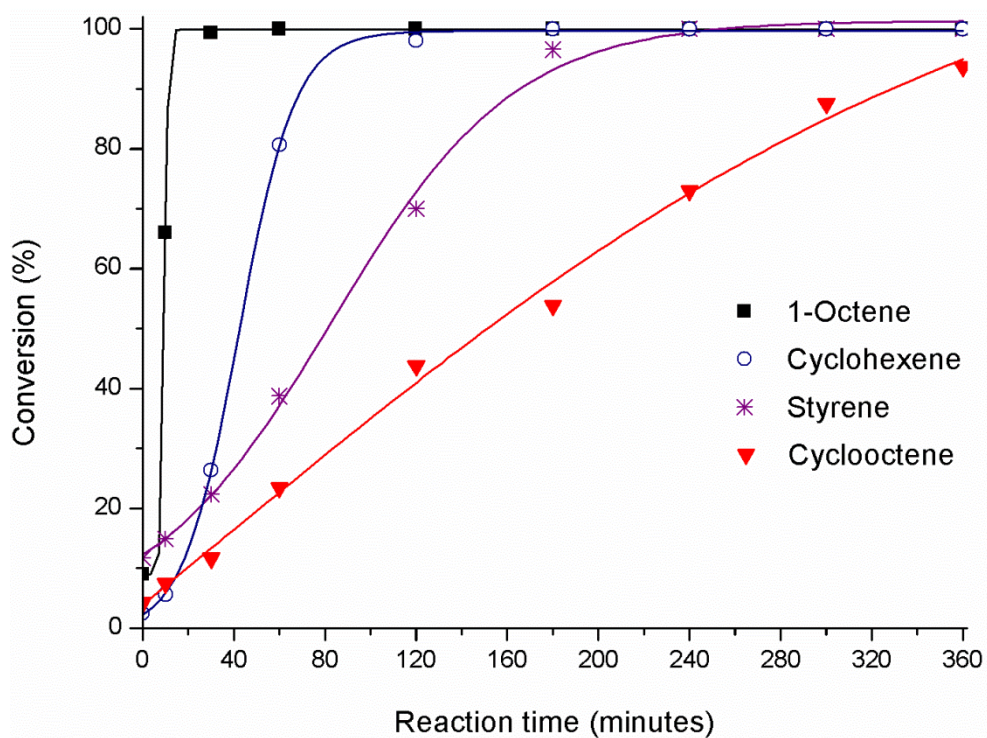

**Figure S4.** Conversion patterns using Pt@MIL-101-Cr-120 cycles as a catalyst and 1-octene (**black**), cyclohexene (**blue**), styrene (**purple**) or cyclooctene (**red**) as the substrate. Reaction conditions: 25 mmol of substrate, 0.05 mmol of catalyst, room temperature, 6 bar of H<sub>2</sub>.

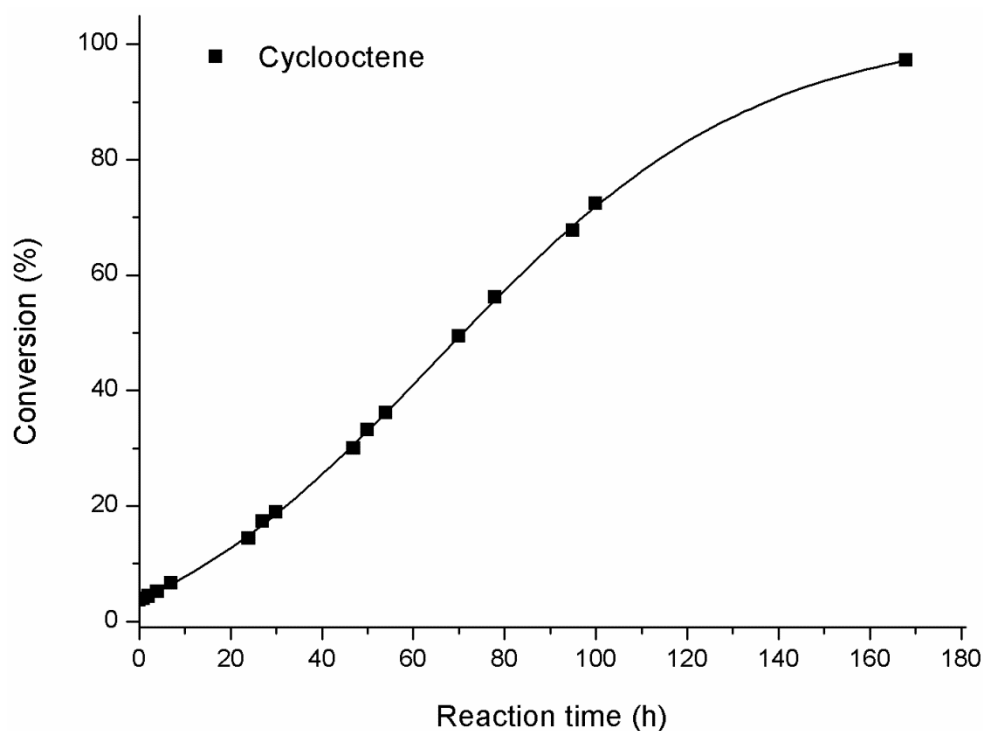

**Figure S5.** Concentrated run using Pt@MIL-101-Cr-120 cycles as a catalyst and cyclooctene as the substrate. Reaction conditions: 250 mmol of cyclooctene, 0.05 mmol of catalyst, room temperature (RT), 6 bar of H<sub>2</sub>.

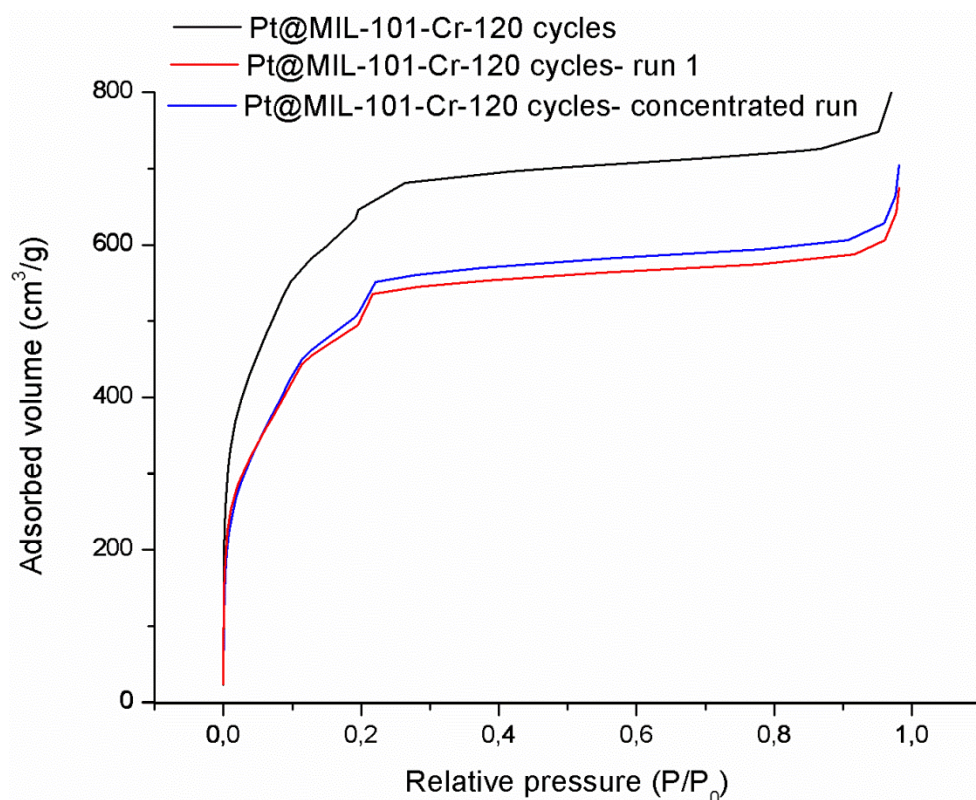

**Figure S6.** Nitrogen adsorption isotherms of Pt@MIL-101-Cr-120 cycles before (**black**) and after the first catalytic run (**red**) and the concentrated catalytic test (**blue**).

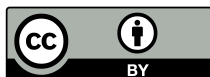

© 2016 by the authors; licensee MDPI, Basel, Switzerland. This article is an open access article distributed under the terms and conditions of the Creative Commons by Attribution (CC-BY) license (<http://creativecommons.org/licenses/by/4.0/>).
